# Supplementary material for: Design, Synthesis, and Structural Characterization of Thioflavones and Thioflavonols as Potential Tyrosinase Inhibitors: In Vitro and In Silico Studies
Source: PubMed Central journal article supplement — ACS Omega. 2022 May 10;7(20):17444–61. doi: 10.1021/acsomega.2c01841 (PMC9134403; doi:10.1021/acsomega.2c01841), 2022-05-10
Supplement: ao2c01841_si_001.pdf [file ao2c01841_si_001.pdf]

## **Supporting information file for manuscript**

### **Design, Synthesis and Structural Characterization of Thioflavones and Thioflavonols as Potential Tyrosinase Inhibitors: In Vitro and In Silico Studies**

Ehsan Ullah Mughal<sup>\*a</sup>, Jamshaid Ashraf<sup>a</sup>, Essam M. Hussein<sup>b,c</sup>, Yasir Nazir<sup>d,e</sup>, Abdulaziz S. Alwuthaynani<sup>b</sup>, Nafeesa Naeem<sup>a</sup>, Amina Sadiq<sup>\*f</sup>, Reem I. Alsantali<sup>g</sup>, Saleh A. Ahmed<sup>†b,c</sup>

<sup>a</sup>*Department of Chemistry, University of Gujrat, Gujrat-50700, Pakistan*

<sup>b</sup>*Department of Chemistry, Faculty of Applied Sciences, Umm Al-Qura University, Makkah 21955, Saudi Arabia*

<sup>c</sup>*Department of Chemistry, Faculty of Science, Assiut University, 71516 Assiut, Egypt*

<sup>d</sup>*Department of Chemistry, Allama Iqbal Open University, Islamabad-44000 Pakistan*

<sup>e</sup>*Department of Chemistry, University of Sialkot, Sialkot-51300, Pakistan*

<sup>f</sup>*Department of Chemistry, Govt. College Women University, Sialkot-51300, Pakistan*

<sup>g</sup>*Department of Pharmaceutical Chemistry, College of Pharmacy, Taif University, P.O. Box 11099, Taif 21944, Saudi Arabia*

---

\*Correspondence may be addressed to: Ehsan Ullah Mughal, Amina Sadiq and Saleh A. Ahmed; E-mail address: [ehsan.ullah@uog.edu.pk](mailto:ehsan.ullah@uog.edu.pk), [amina.sadiq@gcwus.edu.pk](mailto:amina.sadiq@gcwus.edu.pk), [saahmed@uqu.edu.sa](mailto:saahmed@uqu.edu.sa)



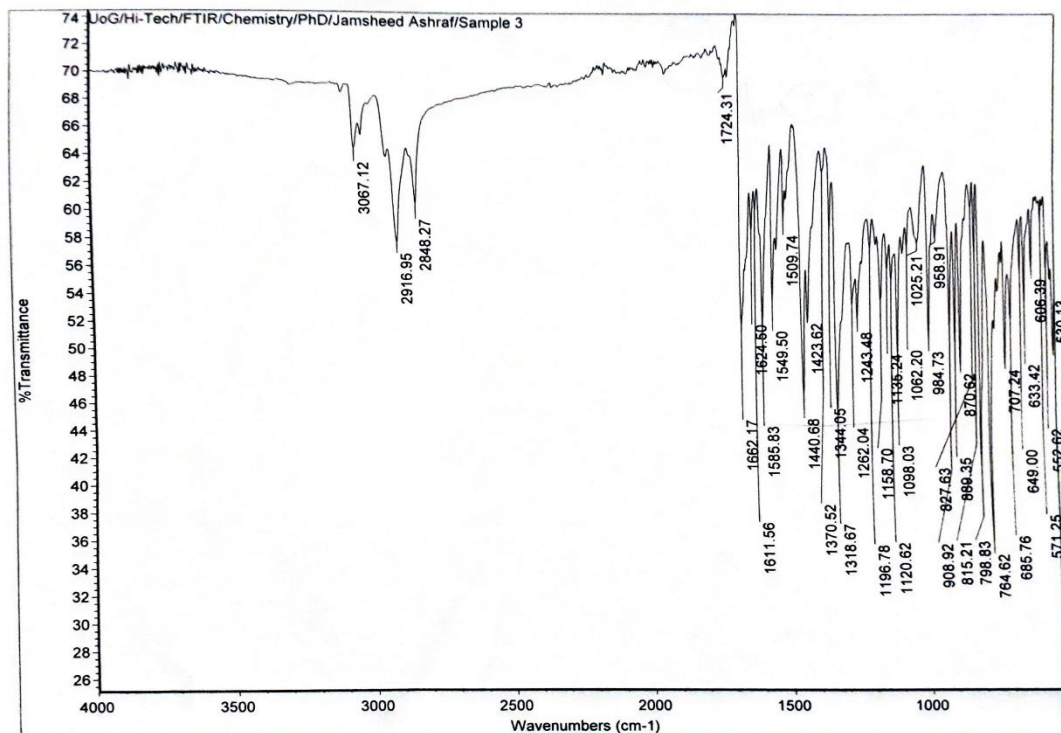

Figure S3. FTIR Spectrum of Compound 2c

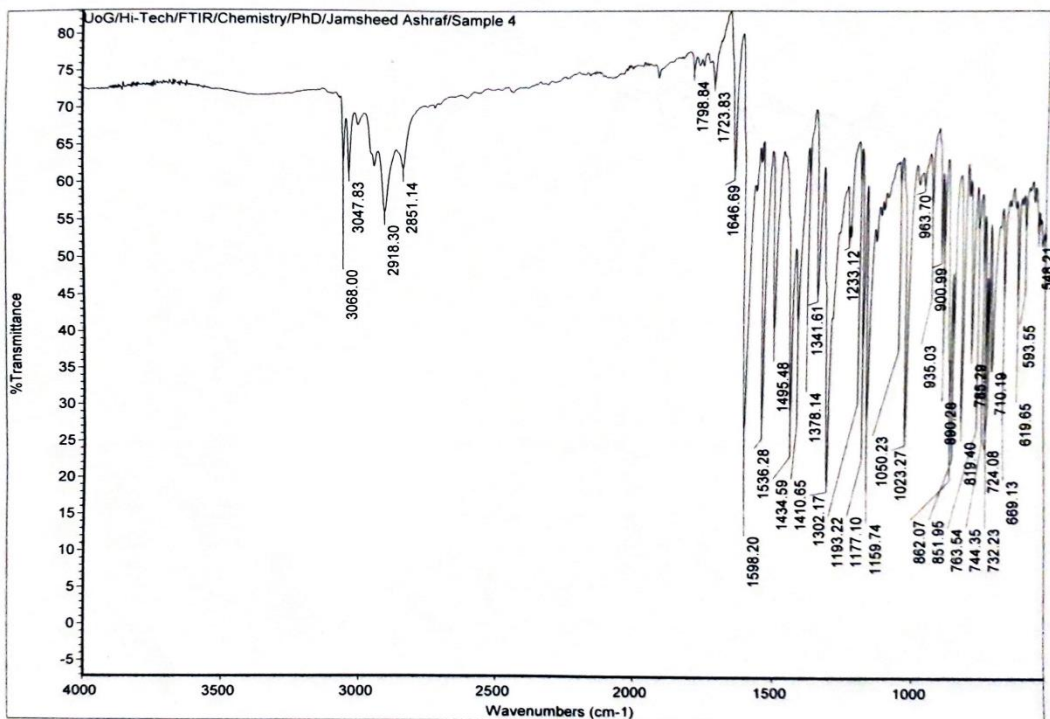

Figure S4. FTIR Spectrum of Compound 2d

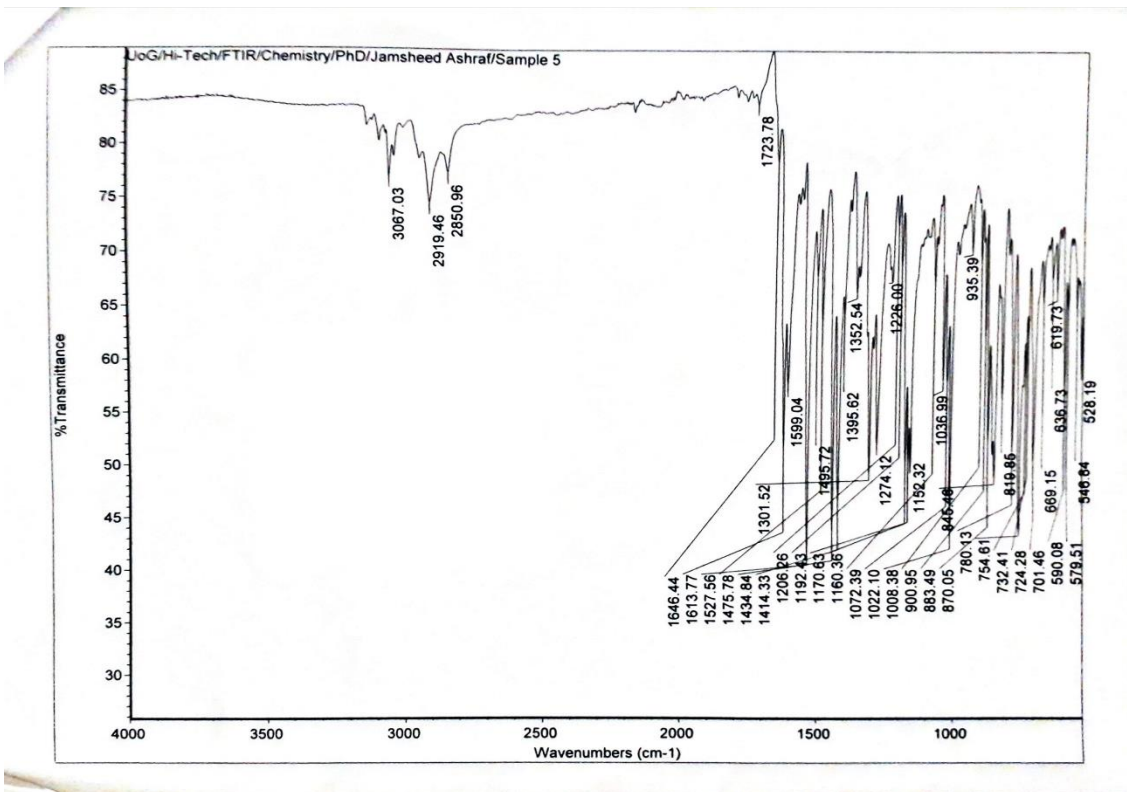

Figure S5. FTIR Spectrum of Compound 2e

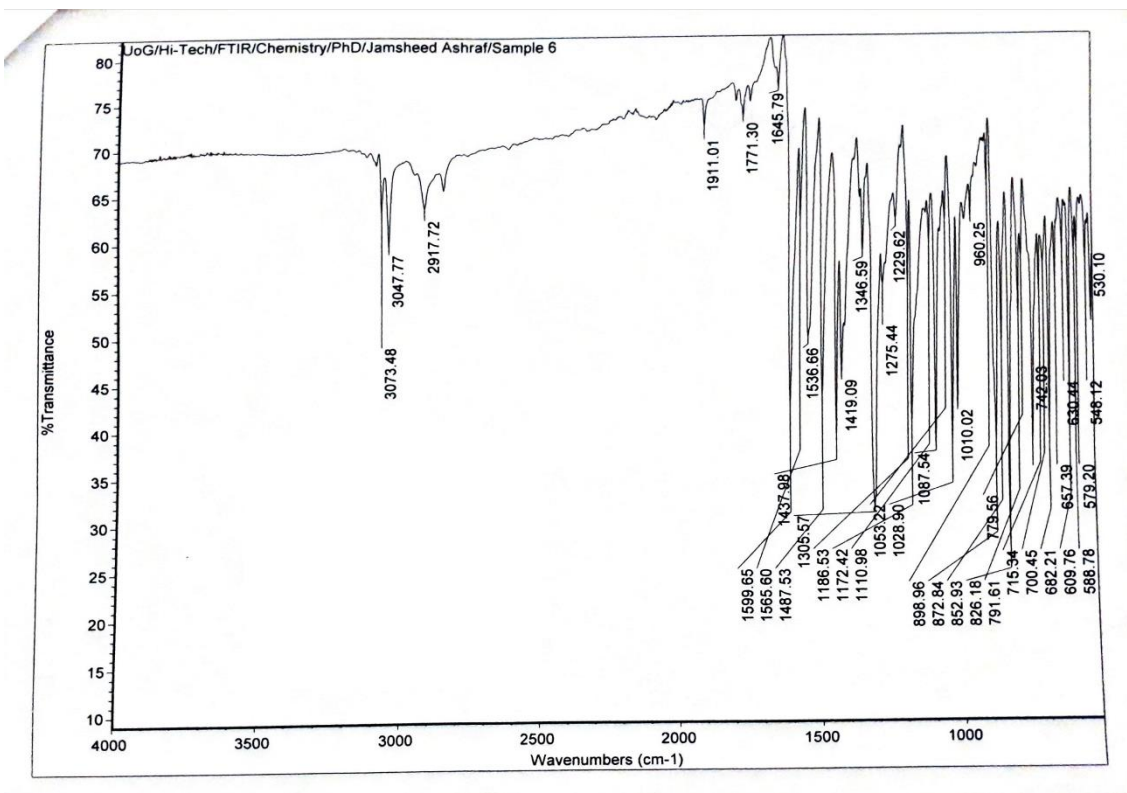

Figure S6. FTIR Spectrum of Compound 2f



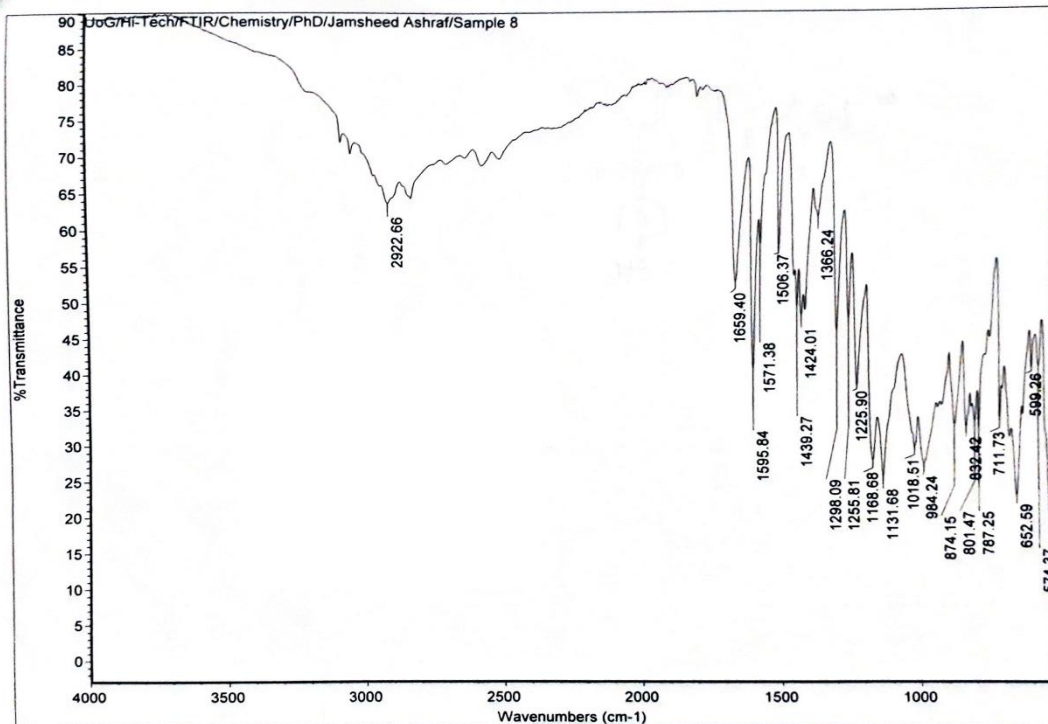

Figure S7. FTIR Spectrum of Compound 2g

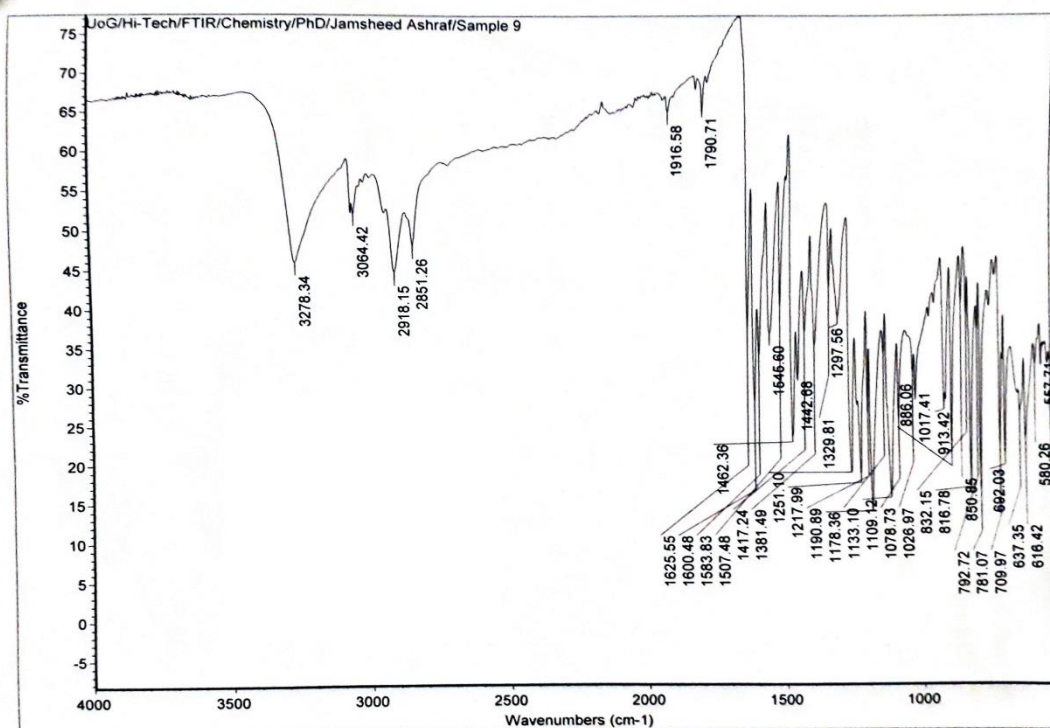

Figure S8. FTIR Spectrum of Compound 2h

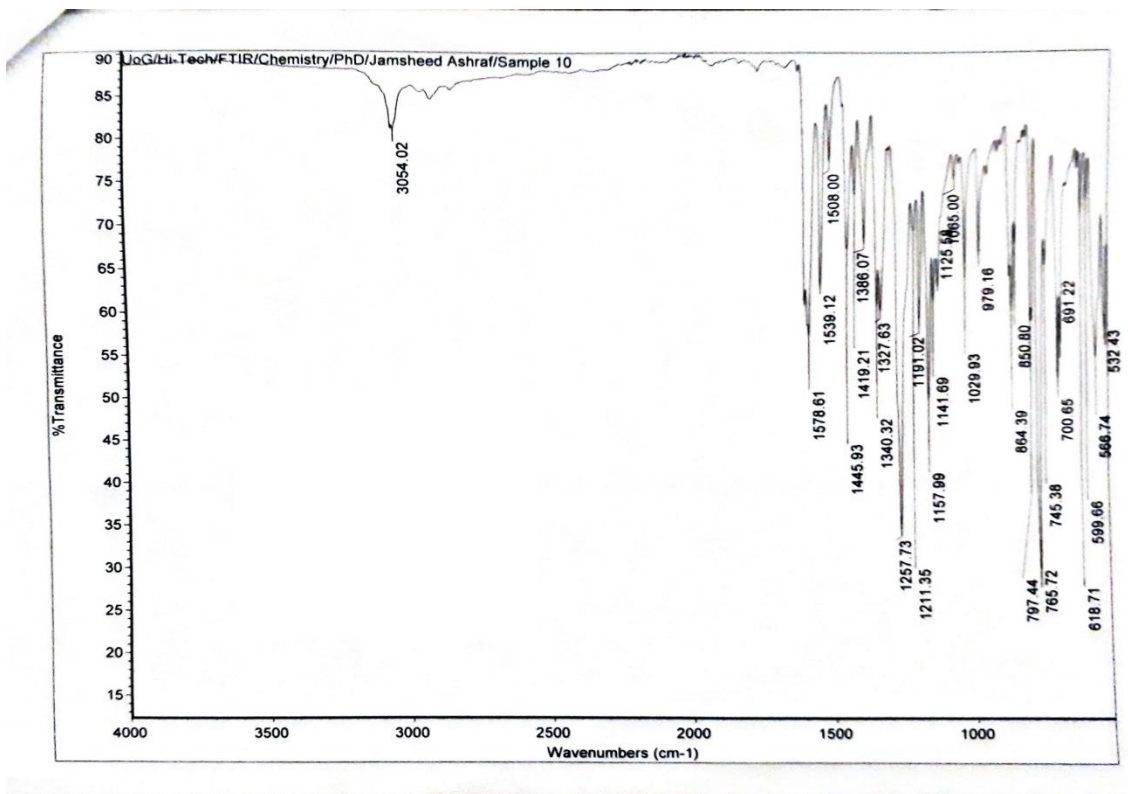

Figure S9. FTIR Spectrum of Compound 2i

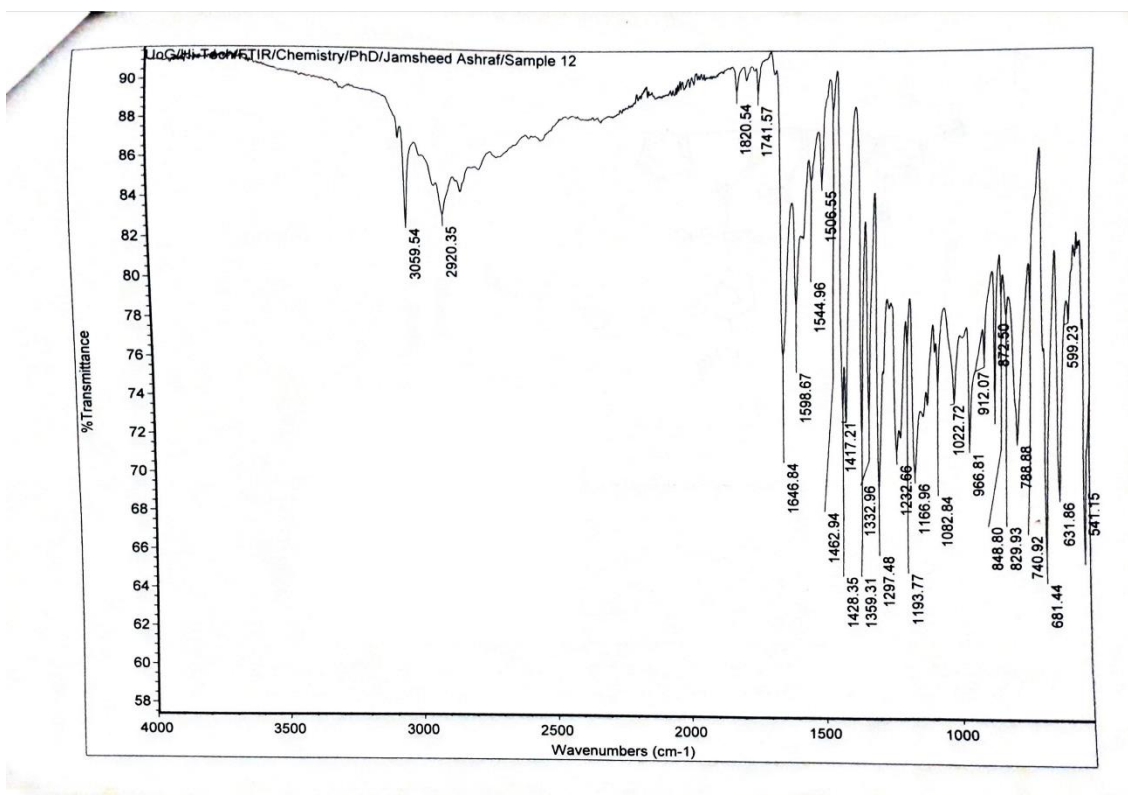

Figure S10. FTIR Spectrum of Compound 2j

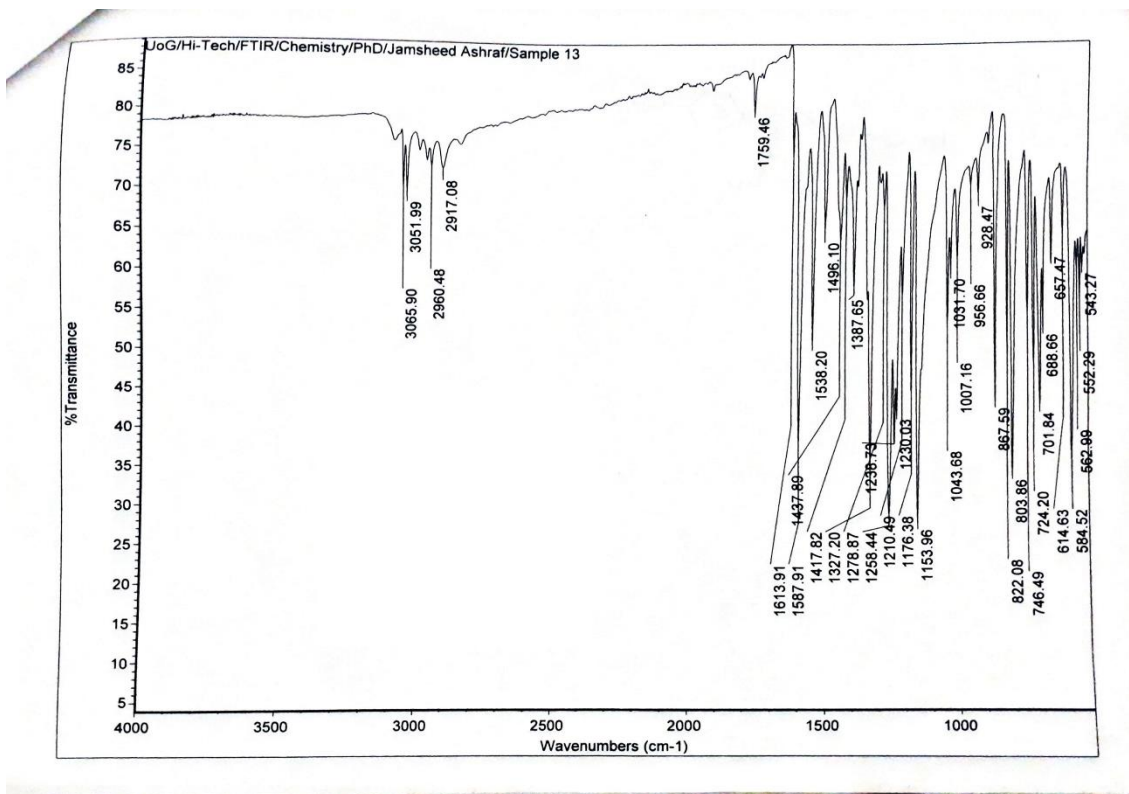

Figure S11. FTIR Spectrum of Compound 2k

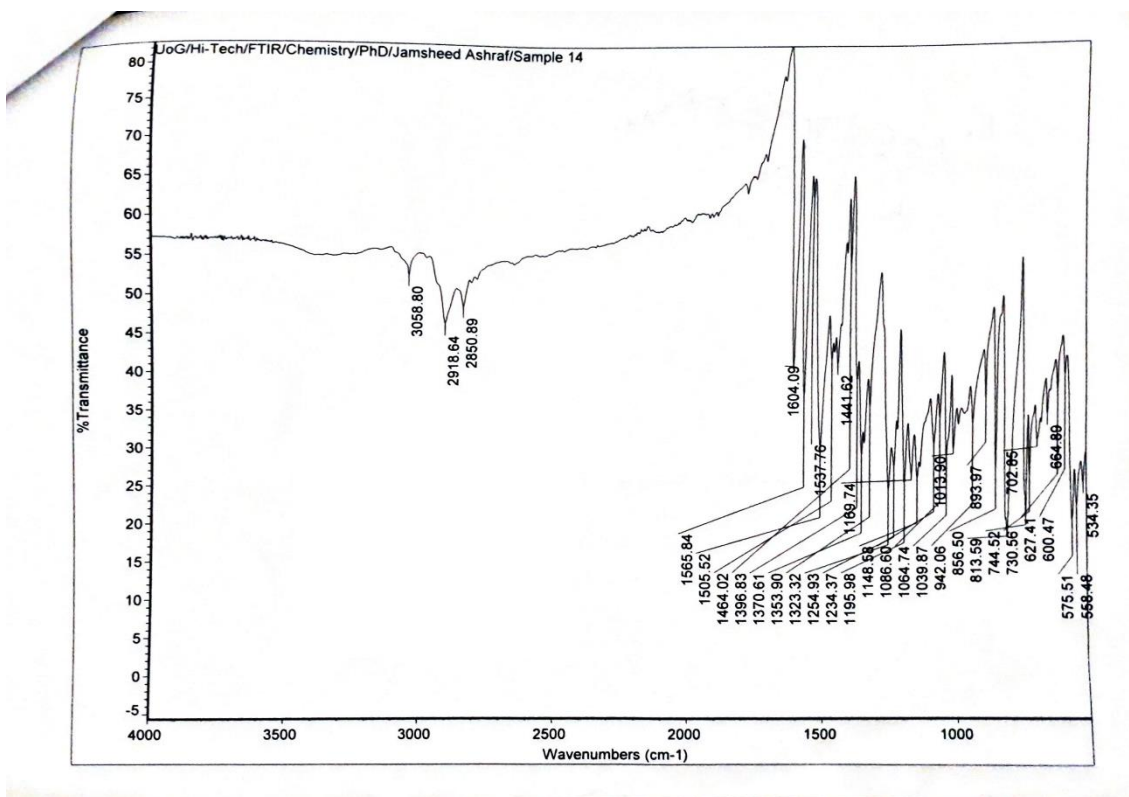

Figure S12. FTIR Spectrum of Compound 2l

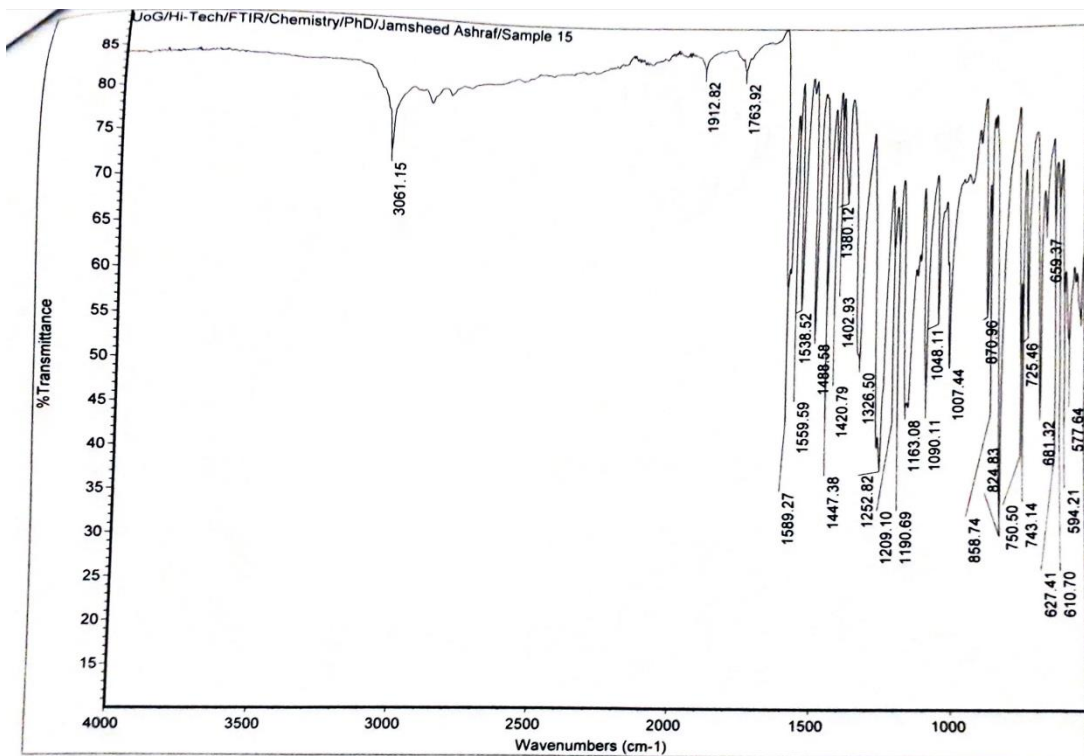

Figure S13. FTIR Spectrum of Compound 2m

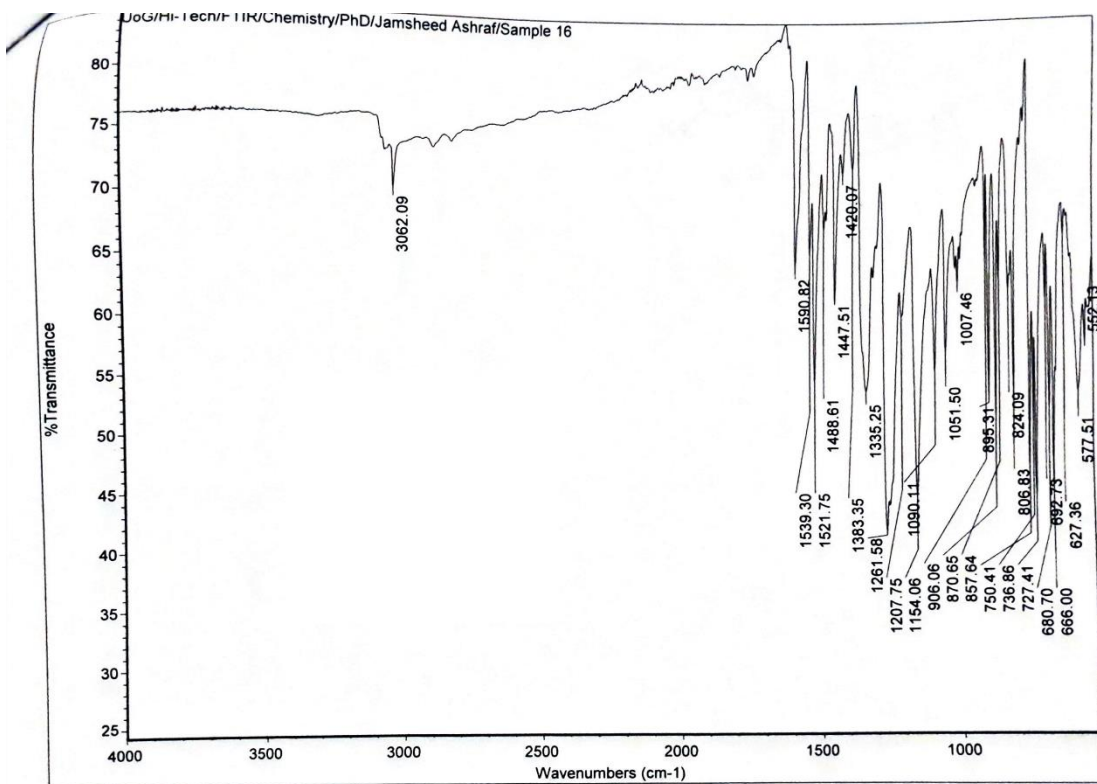

Figure S14. FTIR Spectrum of Compound 2n



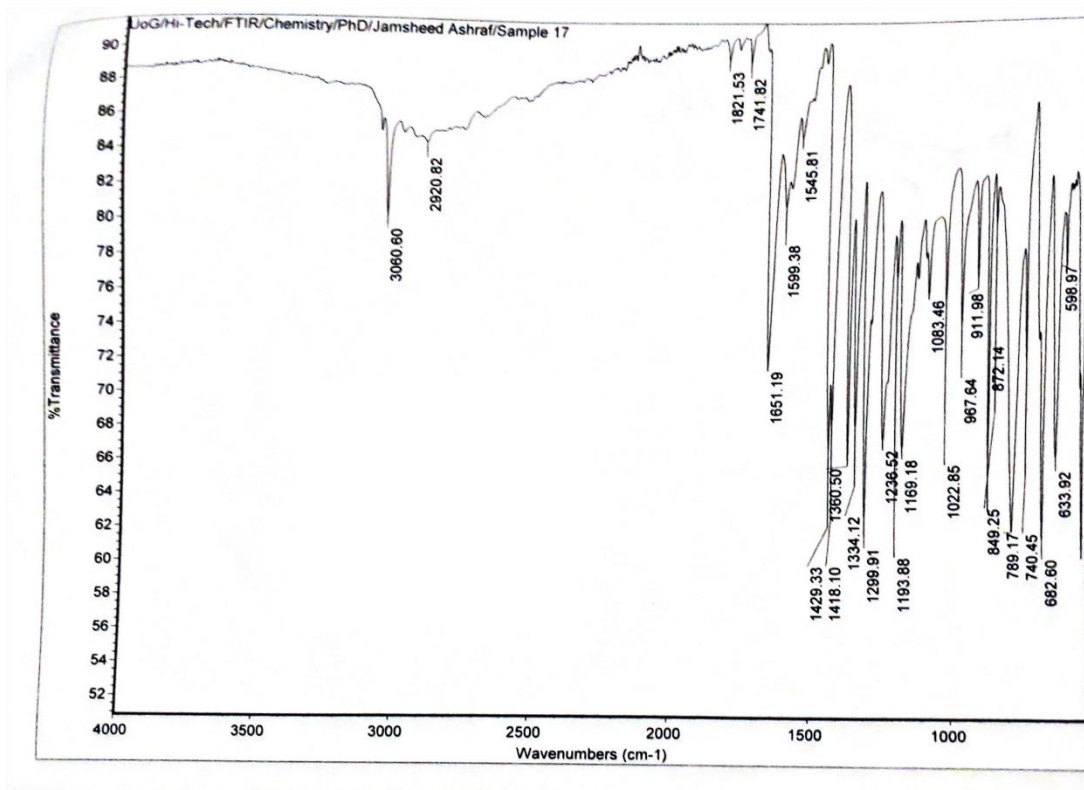

Figure S15. FTIR Spectrum of Compound 2o

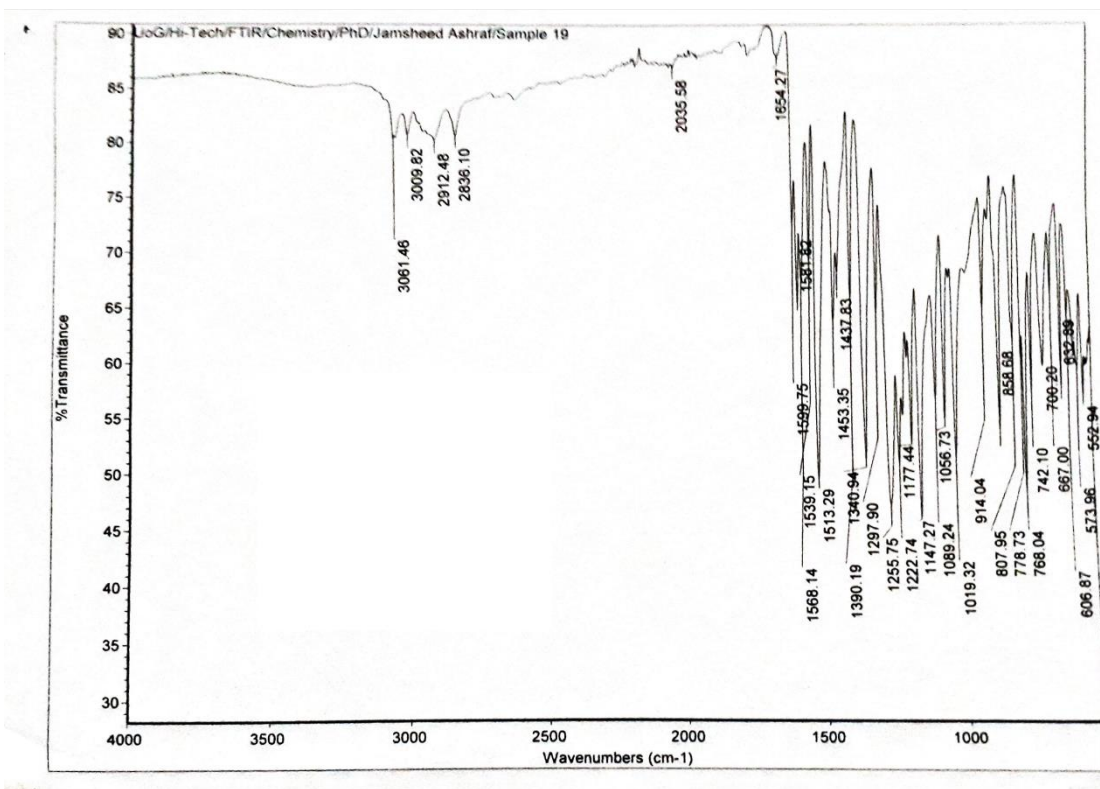

Figure S16. FTIR Spectrum of Compound 2p

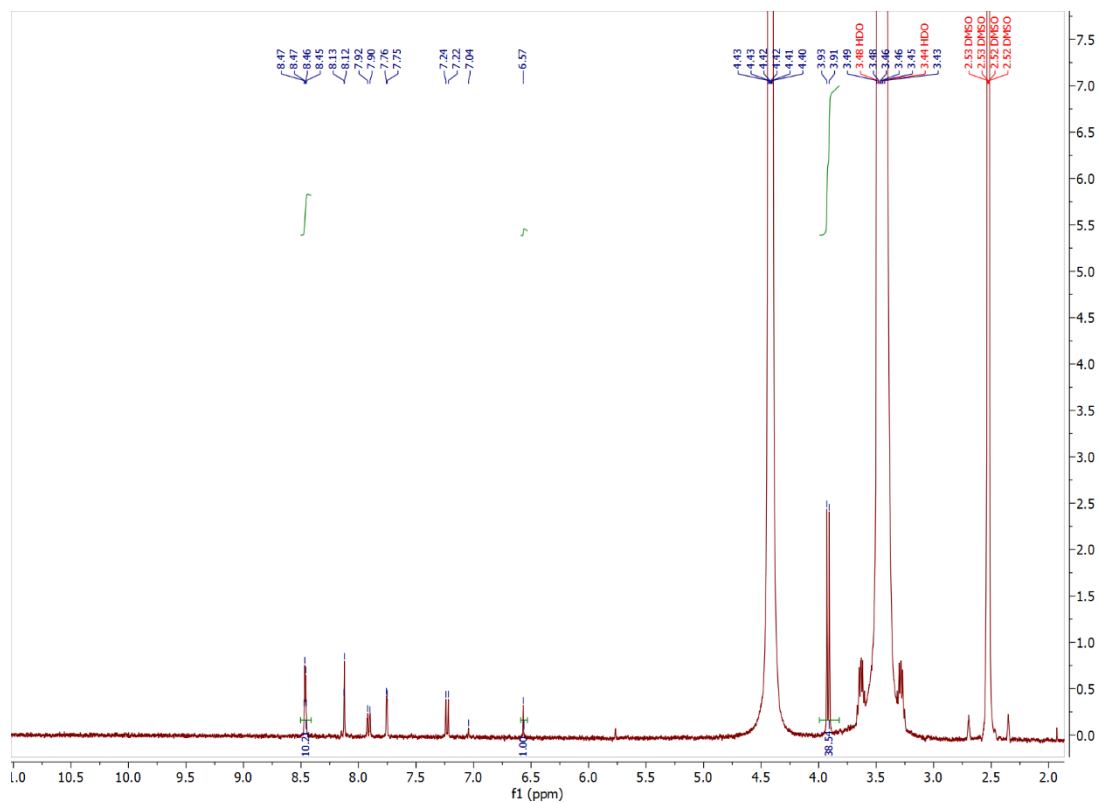

Figure S17. <sup>1</sup>H NMR Spectrum (400 MHz, DMSO) (Compound 2a)

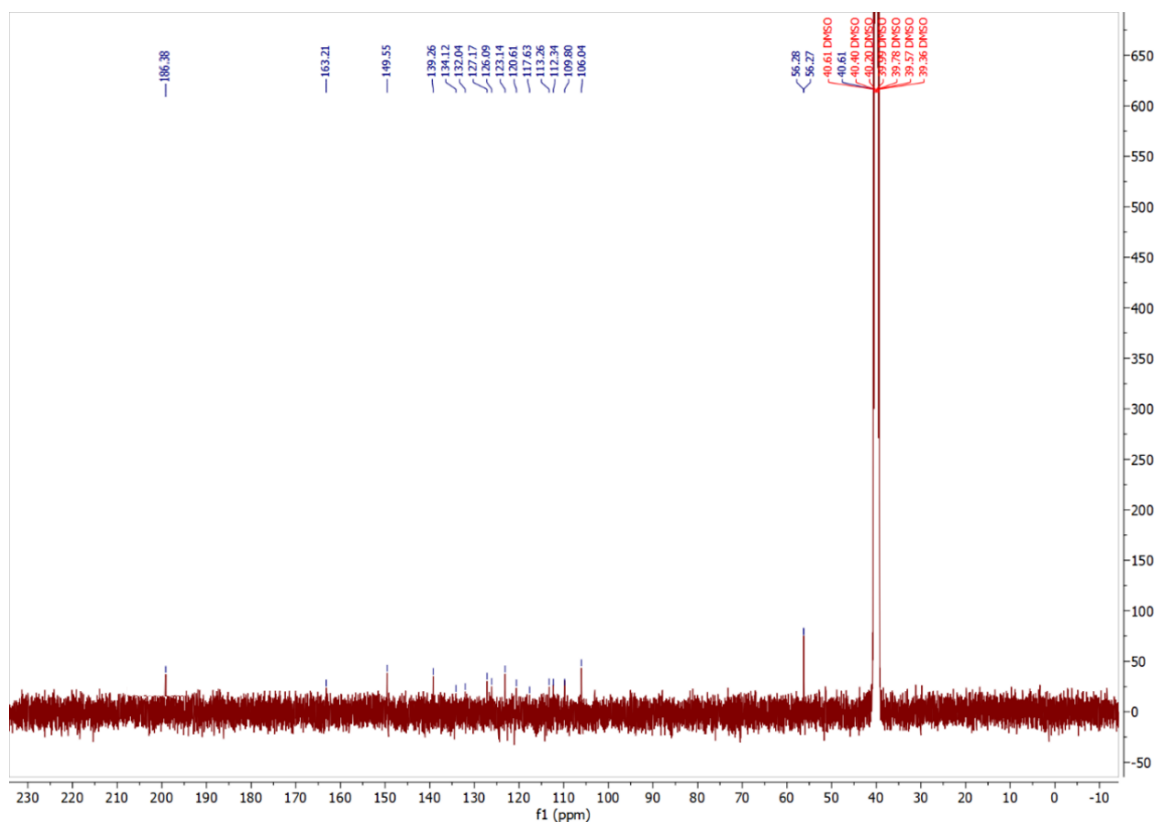

Figure S18. <sup>13</sup>C NMR Spectrum (101 MHz, DMSO) (Compound 2a)

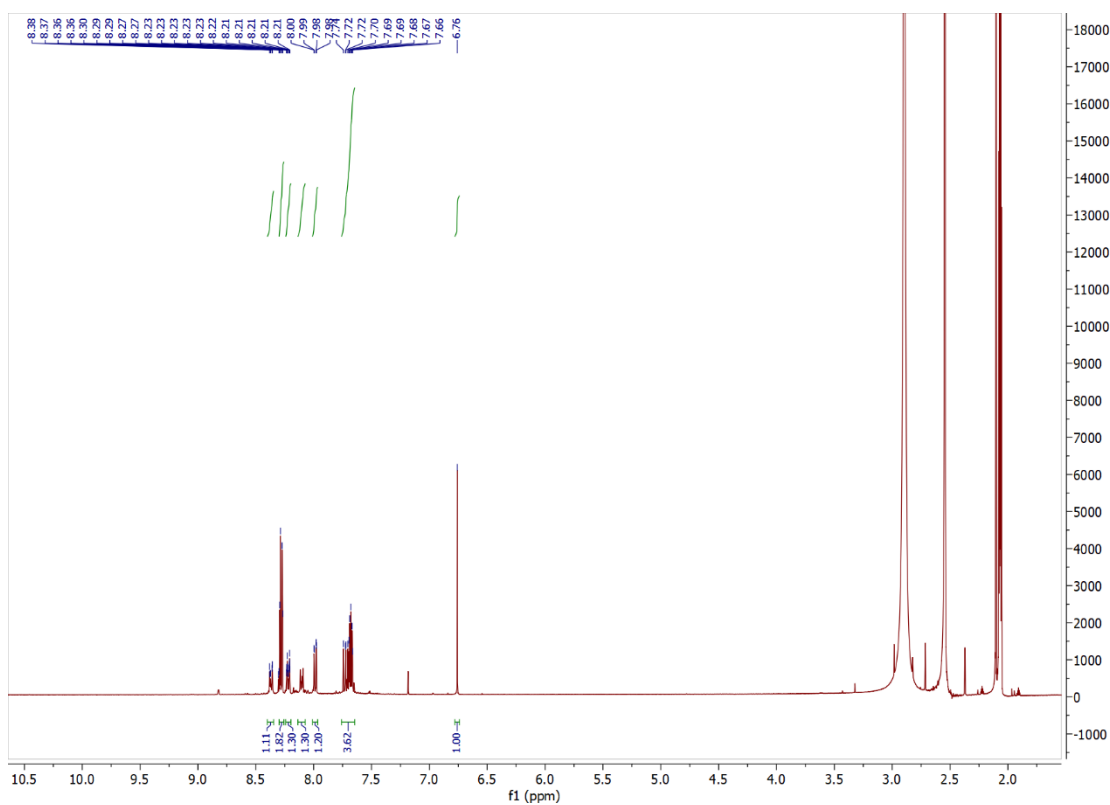

Figure S19.  $^1\text{H}$  NMR Spectrum (400 MHz, DMSO) (Compound 2c)

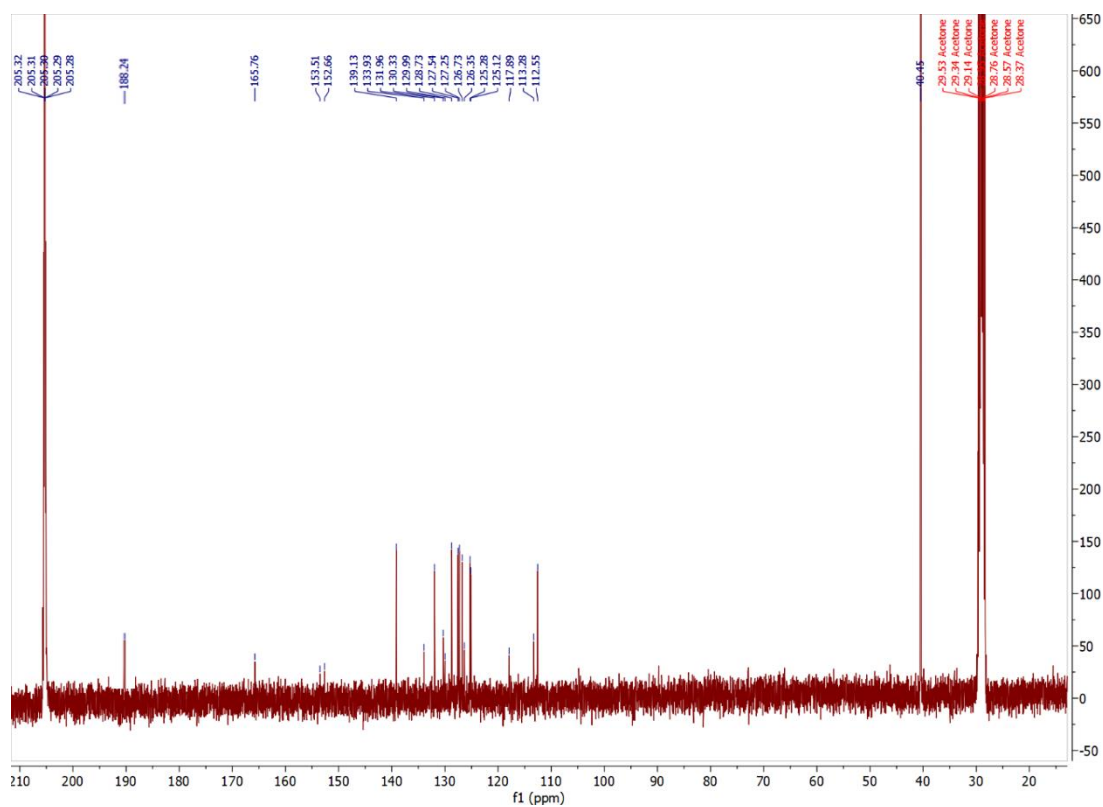

Figure S20.  $^{13}\text{C}$  NMR Spectrum (101 MHz, DMSO) (Compound 2c)

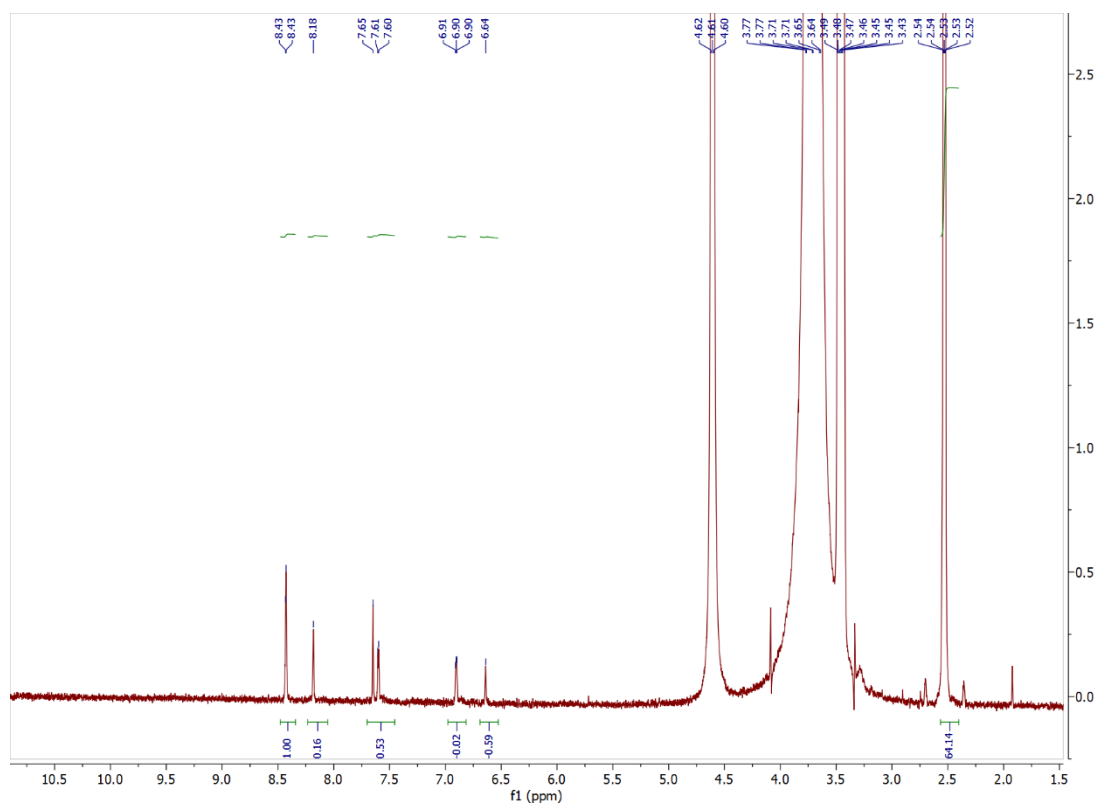

Figure S21. <sup>1</sup>H NMR Spectrum (400 MHz, DMSO) (Compound 2d)

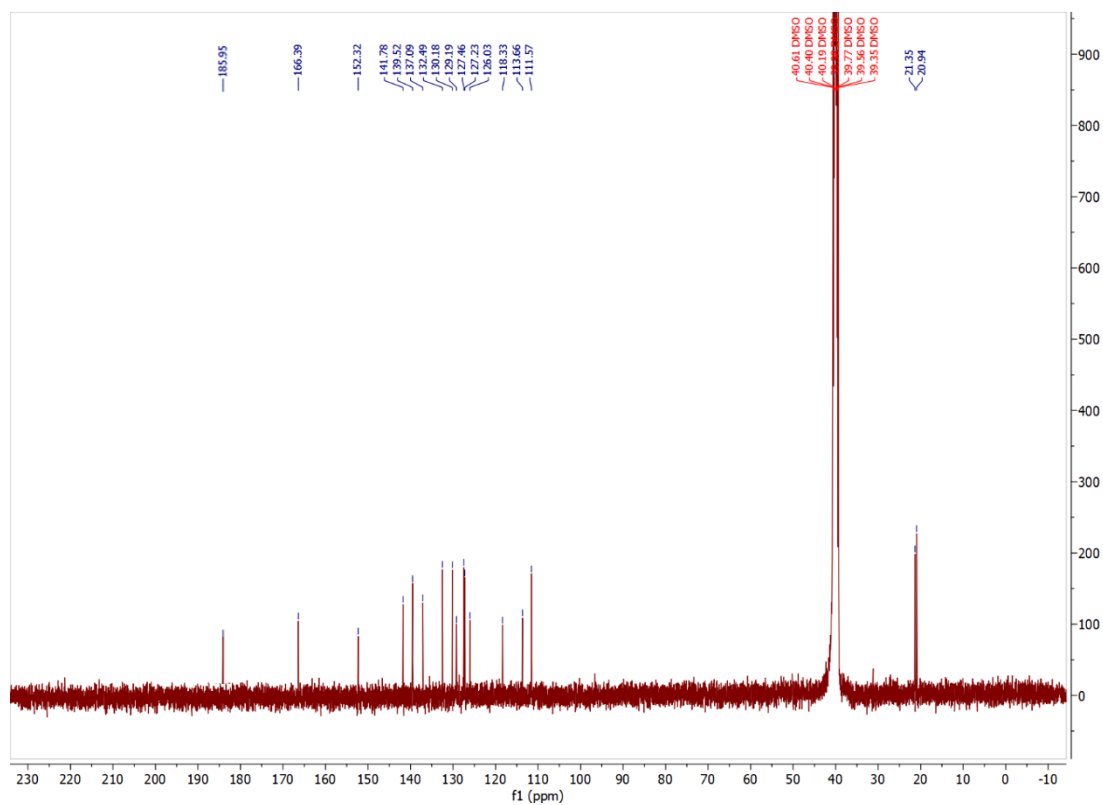

Figure S22. <sup>13</sup>C NMR Spectrum (101 MHz, DMSO) (Compound 2d)



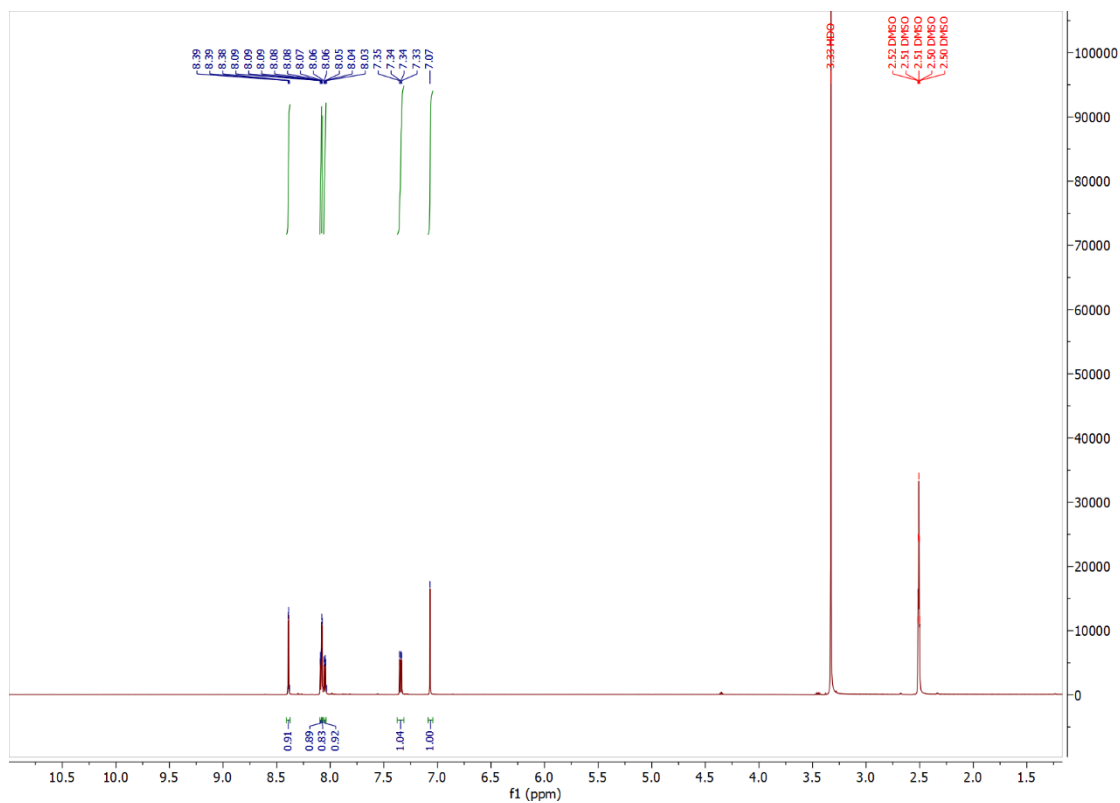

Figure S23.  $^1\text{H}$  NMR Spectrum (400 MHz, DMSO) (Compound 2f)

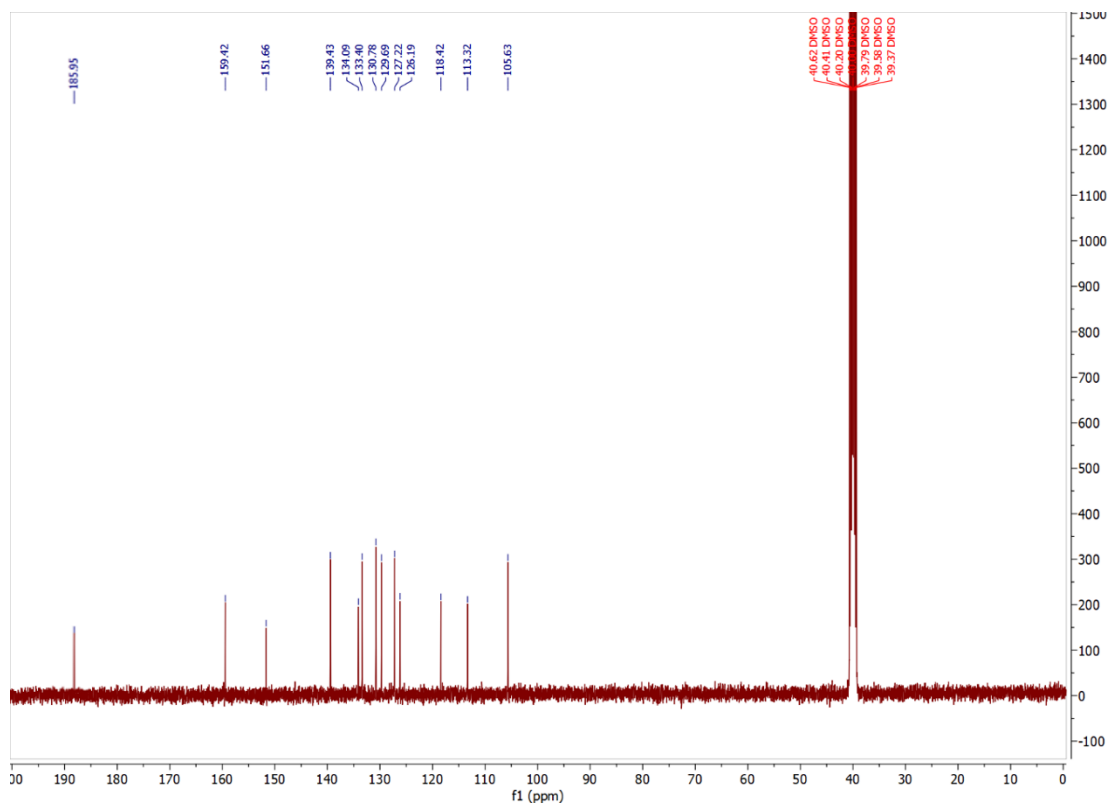

Figure S24.  $^{13}\text{C}$  NMR Spectrum (101 MHz, DMSO) (Compound 2f)

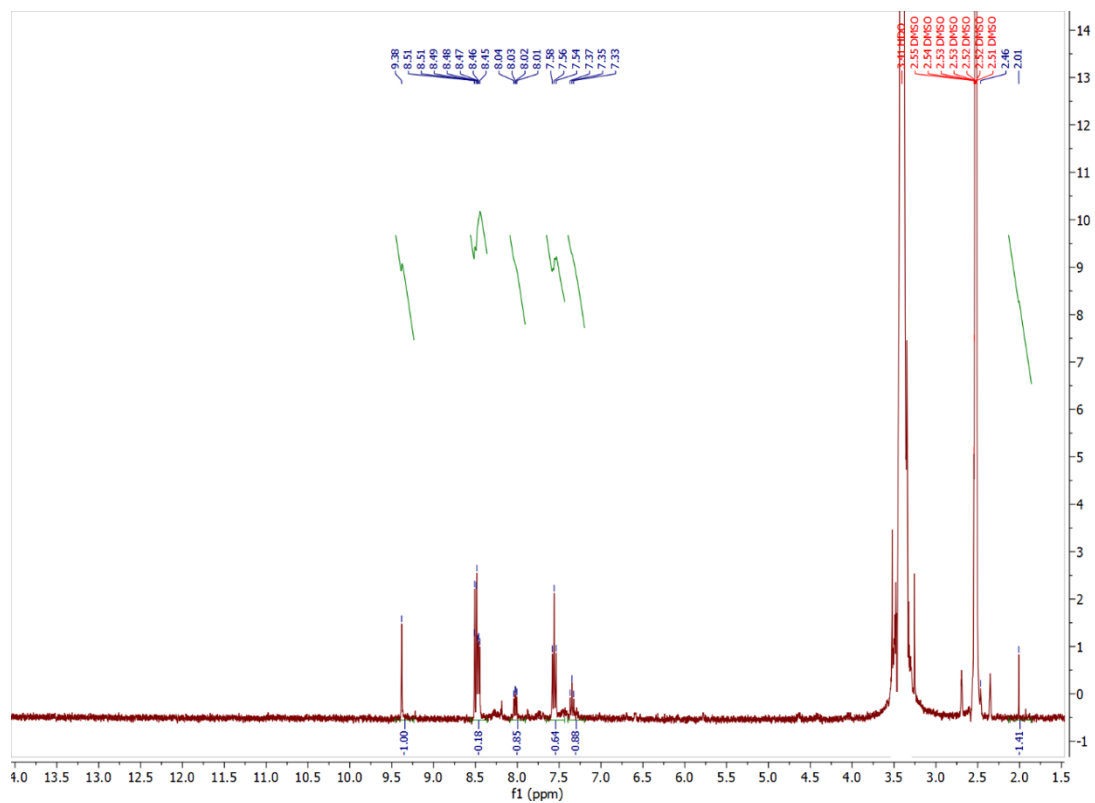

Figure S25.  $^1\text{H}$  NMR Spectrum (400 MHz, DMSO) (Compound 2h)

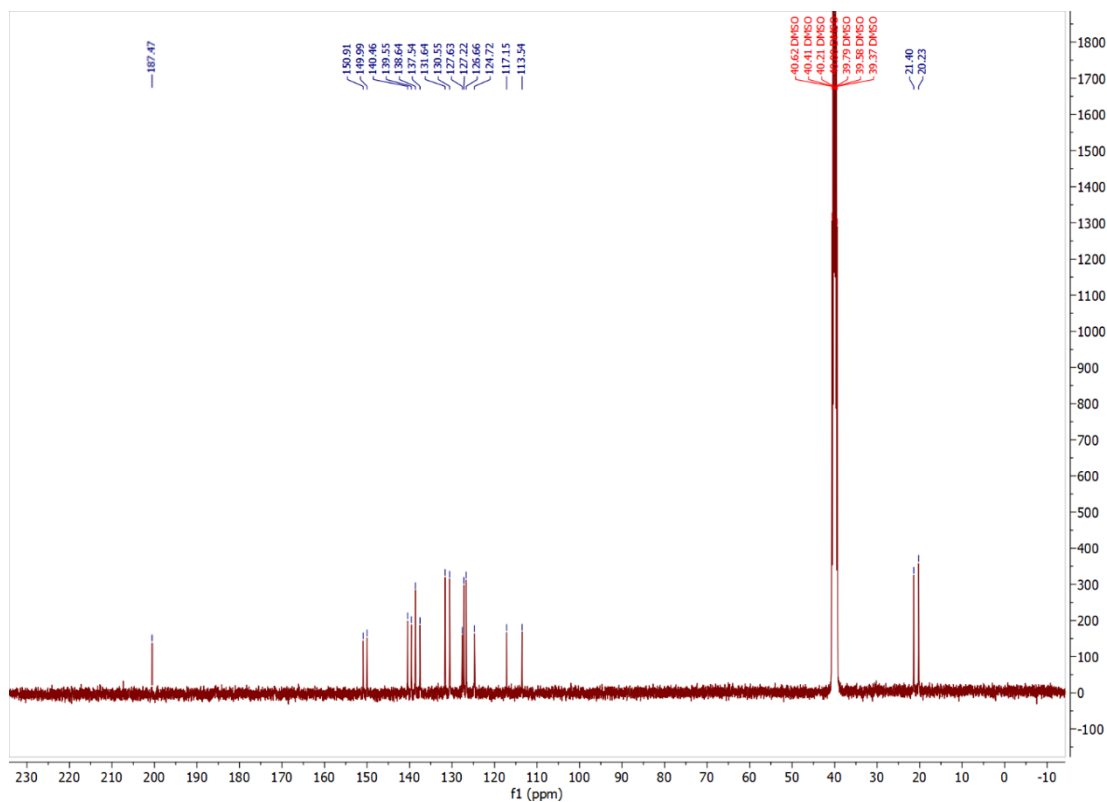

Figure S26.  $^{13}\text{C}$  NMR Spectrum (101 MHz, DMSO) (Compound 2h)



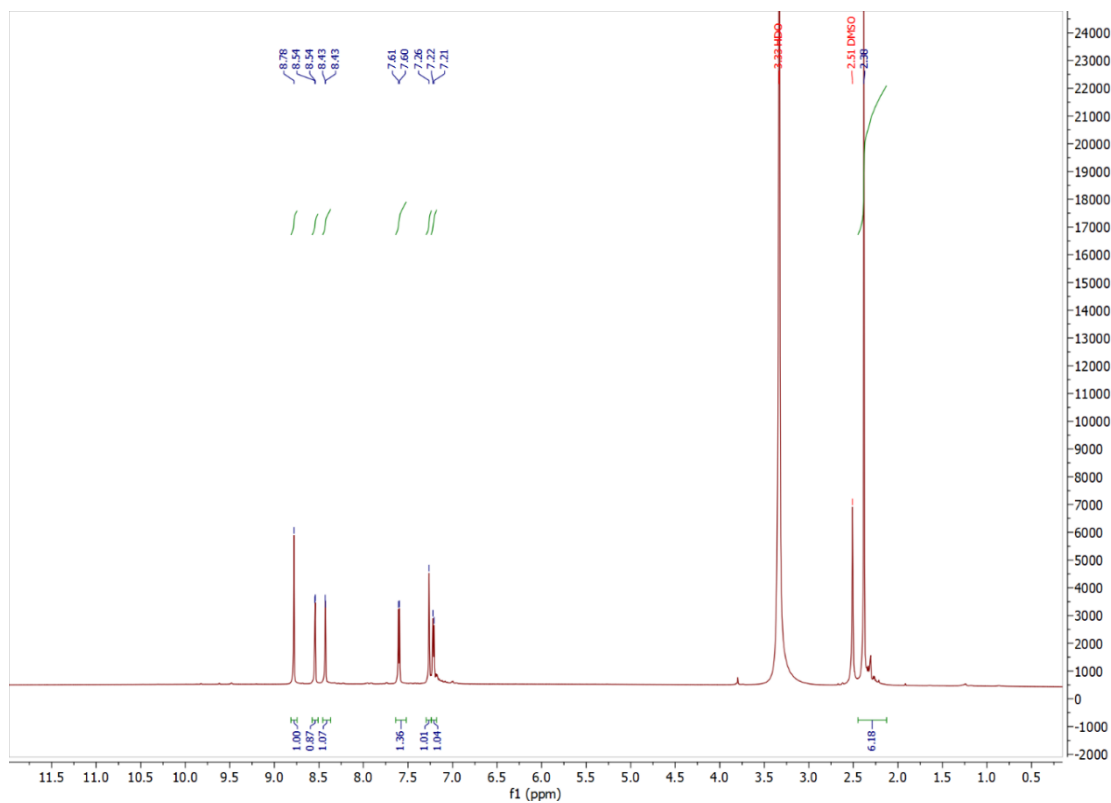

Figure S29. <sup>1</sup>H NMR Spectrum (400 MHz, DMSO) (Compound 2k)

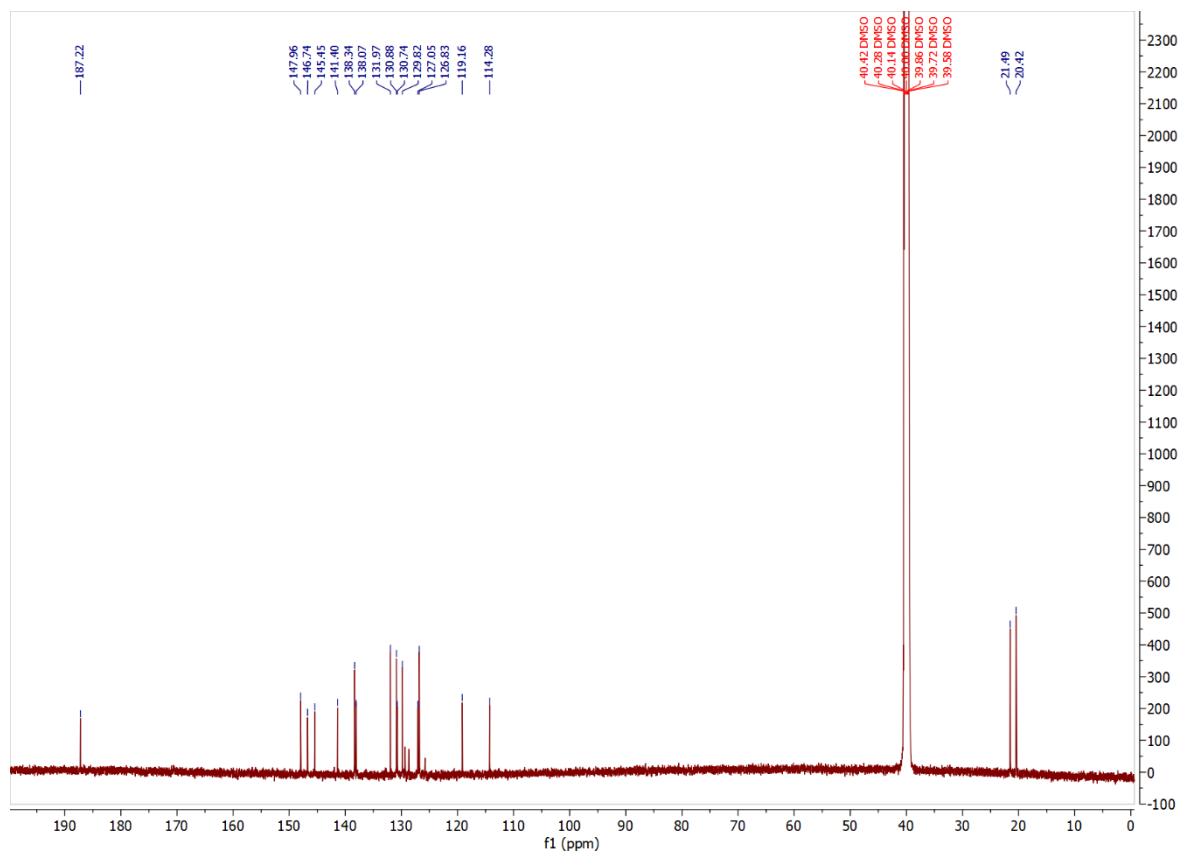

Figure S30. <sup>13</sup>C NMR Spectrum (101 MHz, DMSO) (Compound 2k)



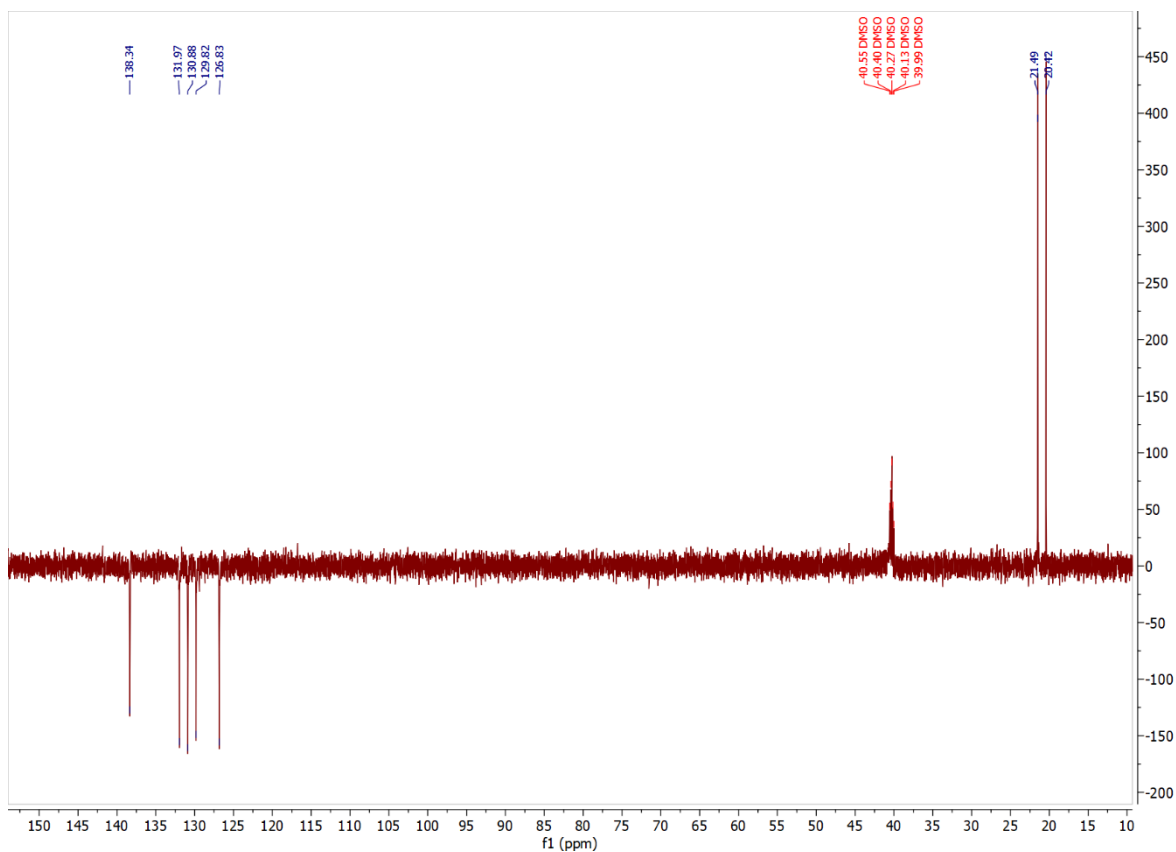

Figure S31. DEPT NMR Spectrum (101 MHz, DMSO) (Compound 2k)

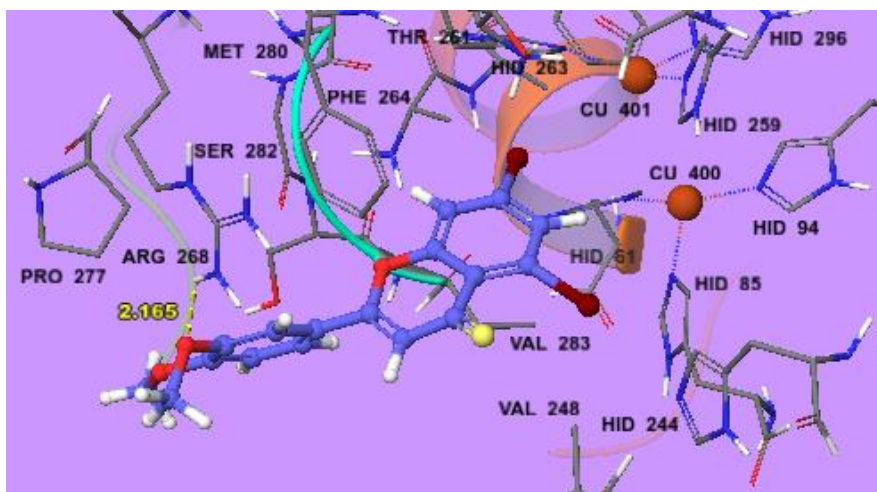

Figure S32. Docking Image of Compound 2a

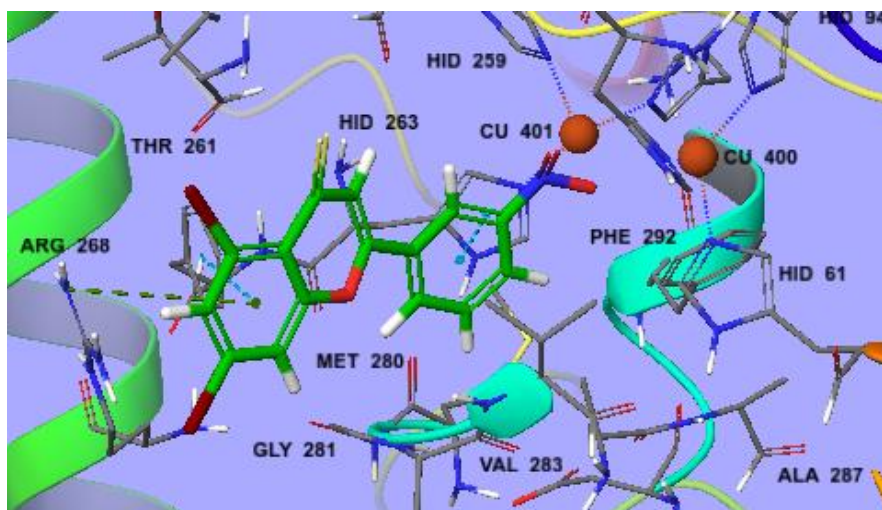

Figure S33. Docking Image of Compound 2b

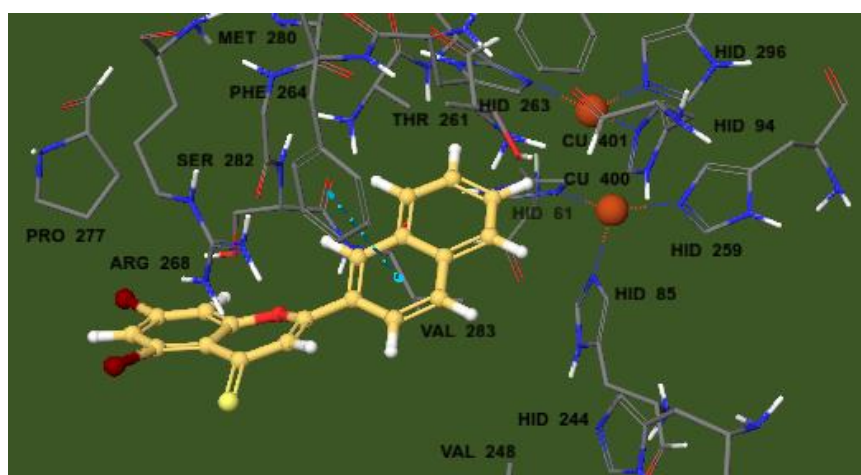

Figure S34. Docking Image of Compound 2c

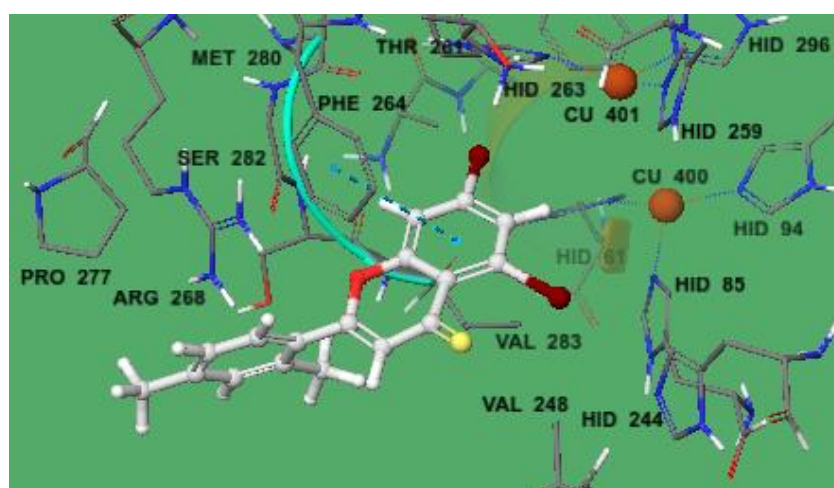

Figure S35. Docking Image of Compound 2d

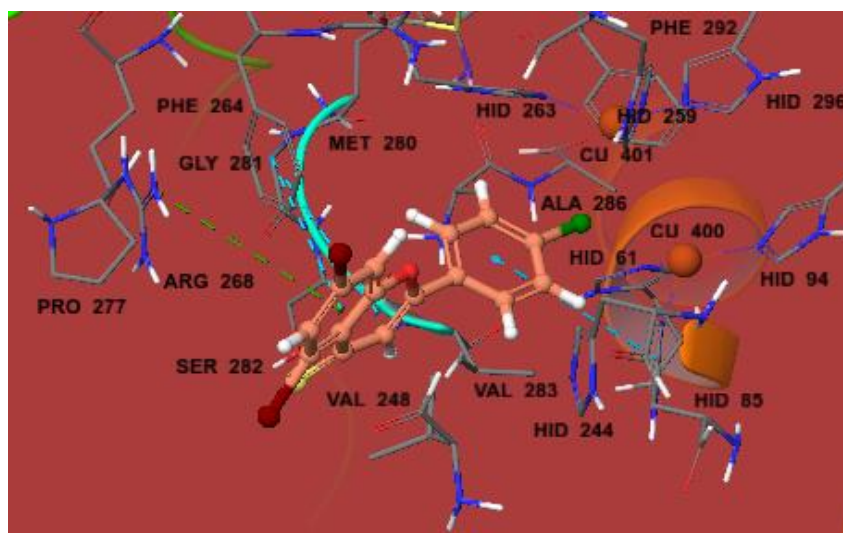

**Figure S36. Docking Image of Compound 2e**

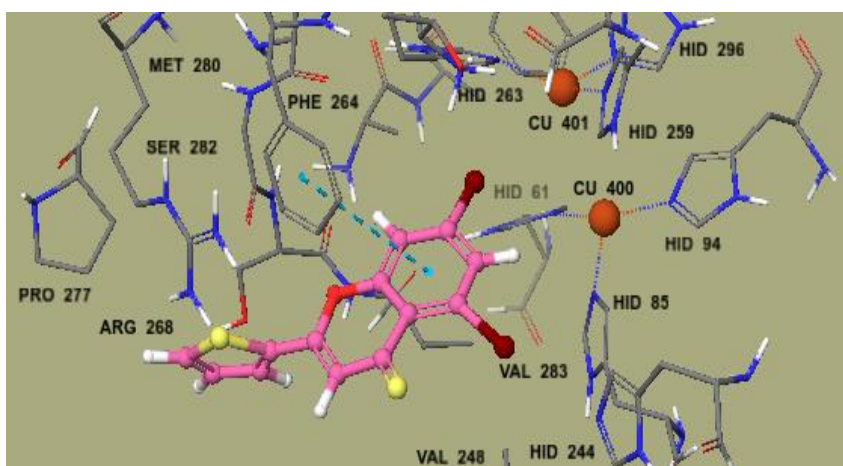

**Figure S37. Docking Image of Compound 2f**

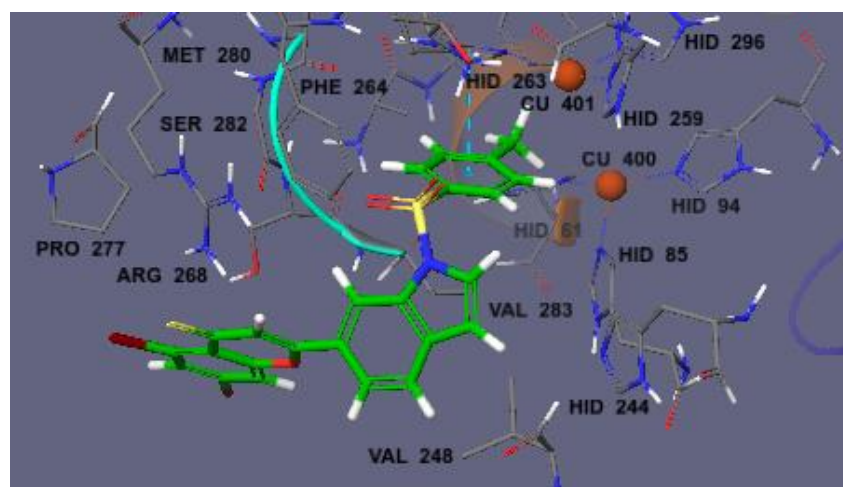

**Figure S38. Docking Image of Compound 2g**



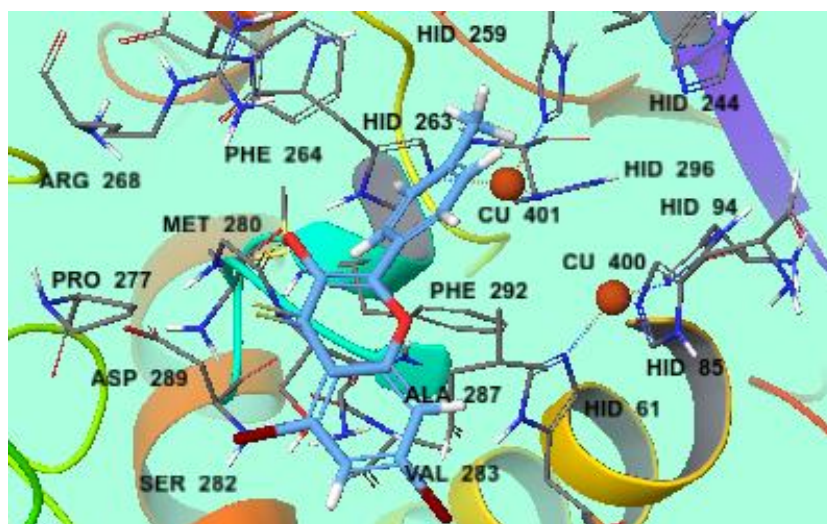

Figure S39. Docking Image of Compound 2h

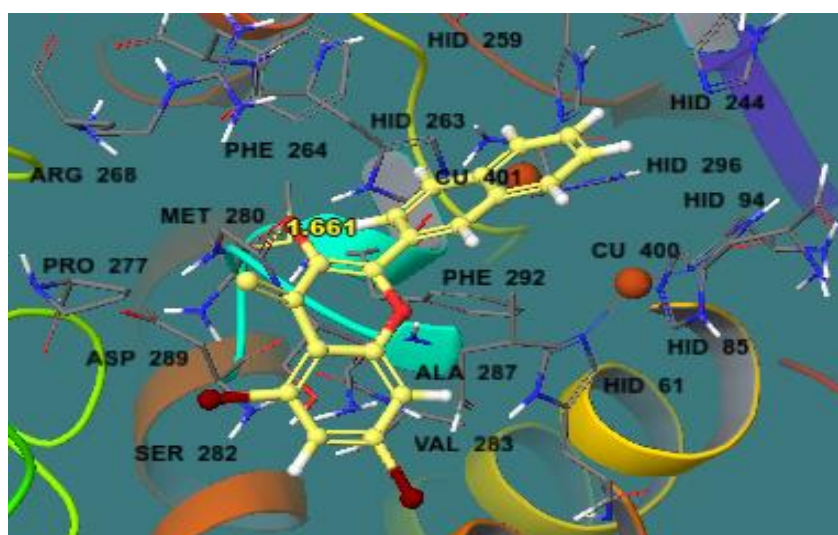

Figure S40. Docking Image of Compound 2i

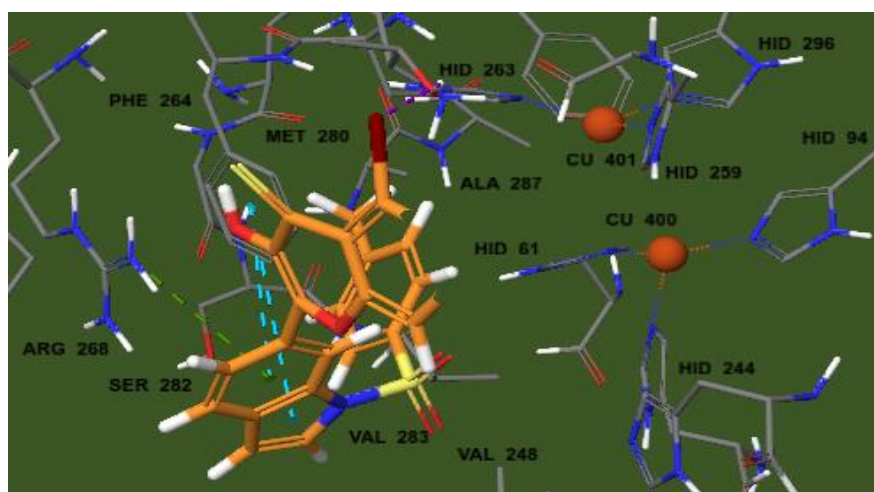

Figure S41. Docking Image of Compound 2j



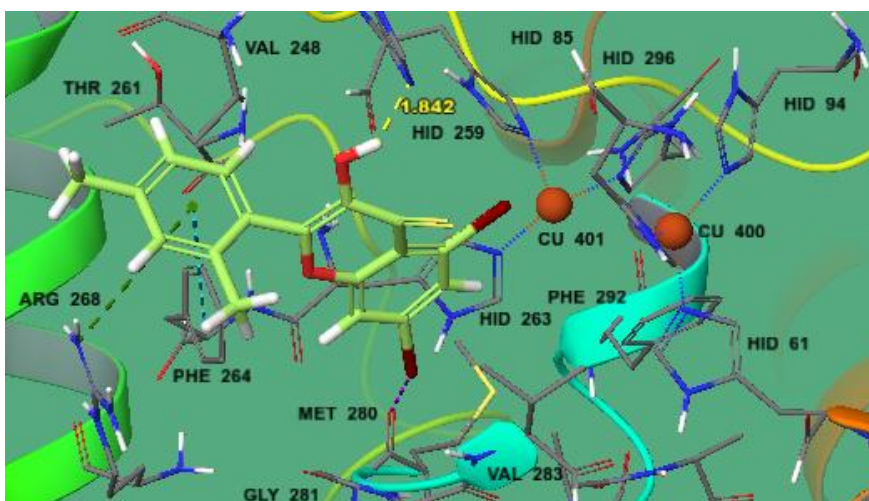

Figure S42. Docking Image of Compound 2k

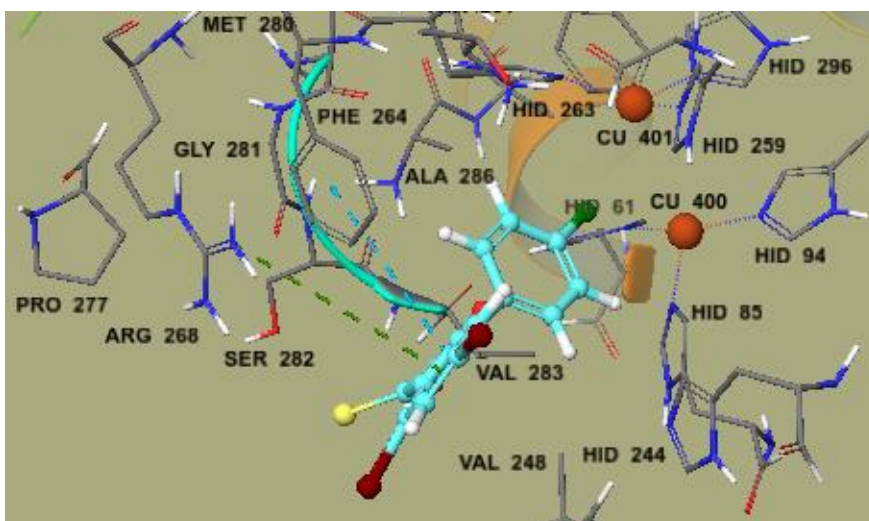

Figure S43. Docking Image of Compound 2l

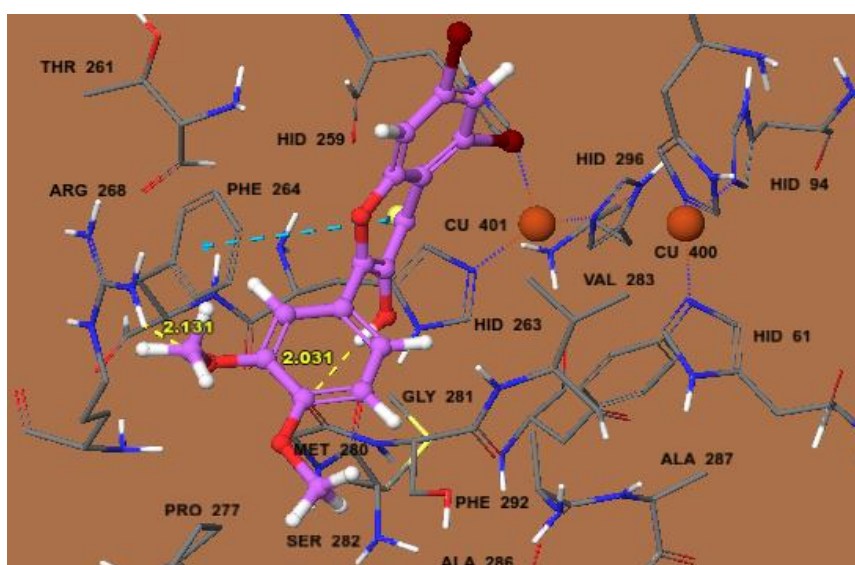

Figure S44. Docking Image of Compound 2p

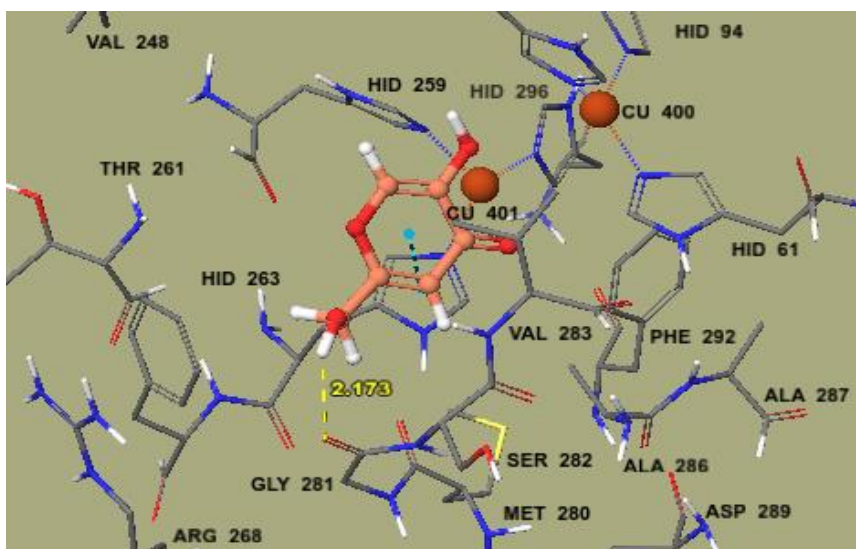

Figure S45. Docking Image of Kojic Acid
